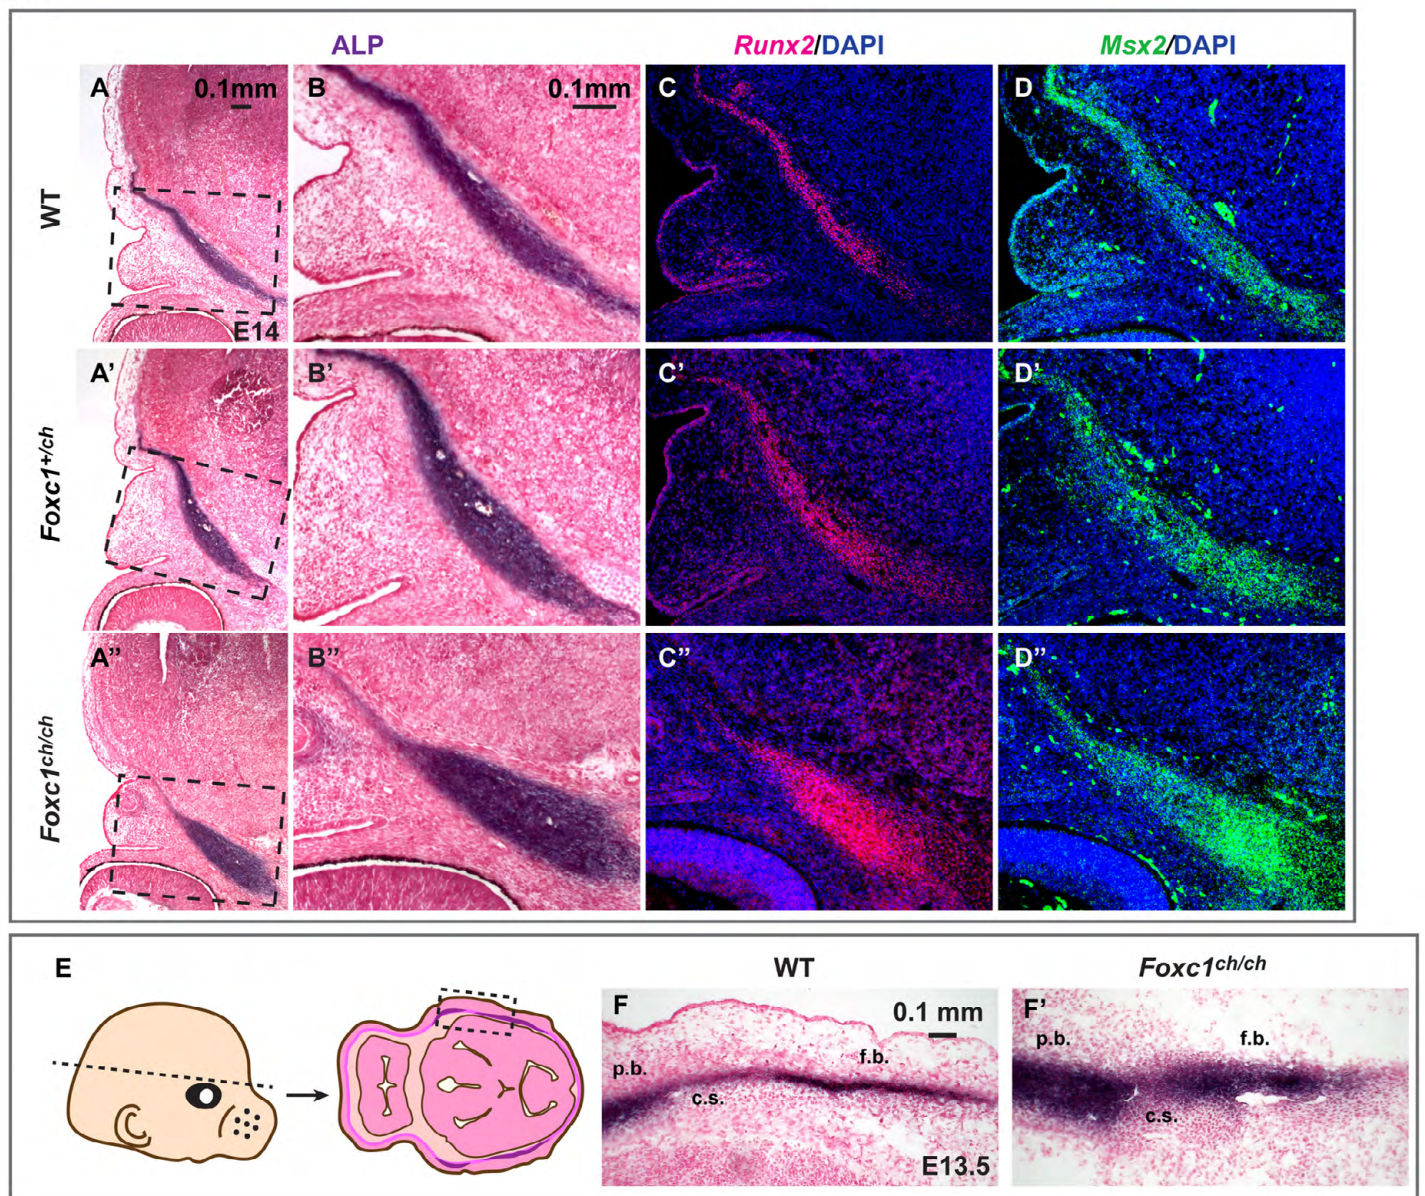

**Fig. S1. *Foxc1* dose-dependant expansion of the osteogenic domain in frontal and parietal bone rudiments. (A-D'')** We detected ALP activity, *Runx2* and *Msx2* mRNA in adjacent sections from E14 wild-type, heterozygous and homozygous *Foxc1* mutant embryos. There is *Foxc1* dose-dependant expansion in ALP, and *Runx2* and *Msx2* expression domains at the cranial base. *Runx2*, also a marker for osteoblast differentiation, is expressed in a similar manner to ALP in both wild-type and *Foxc1* mutant embryos (C',C''). **(E,F')** Transverse sections through the coronal suture immediately above the eyes (shown in E) from E13.5 wild-type and *Foxc1* mutant embryos were stained for ALP. There is an increase in the thickness of the osteogenic tissue layers in both frontal and parietal rudiments in the *Foxc1* mutant and the the coronal suture narrows. f.b., frontal bone rudiment; p.b., parietal bone rudiment; c.s., coronal suture.



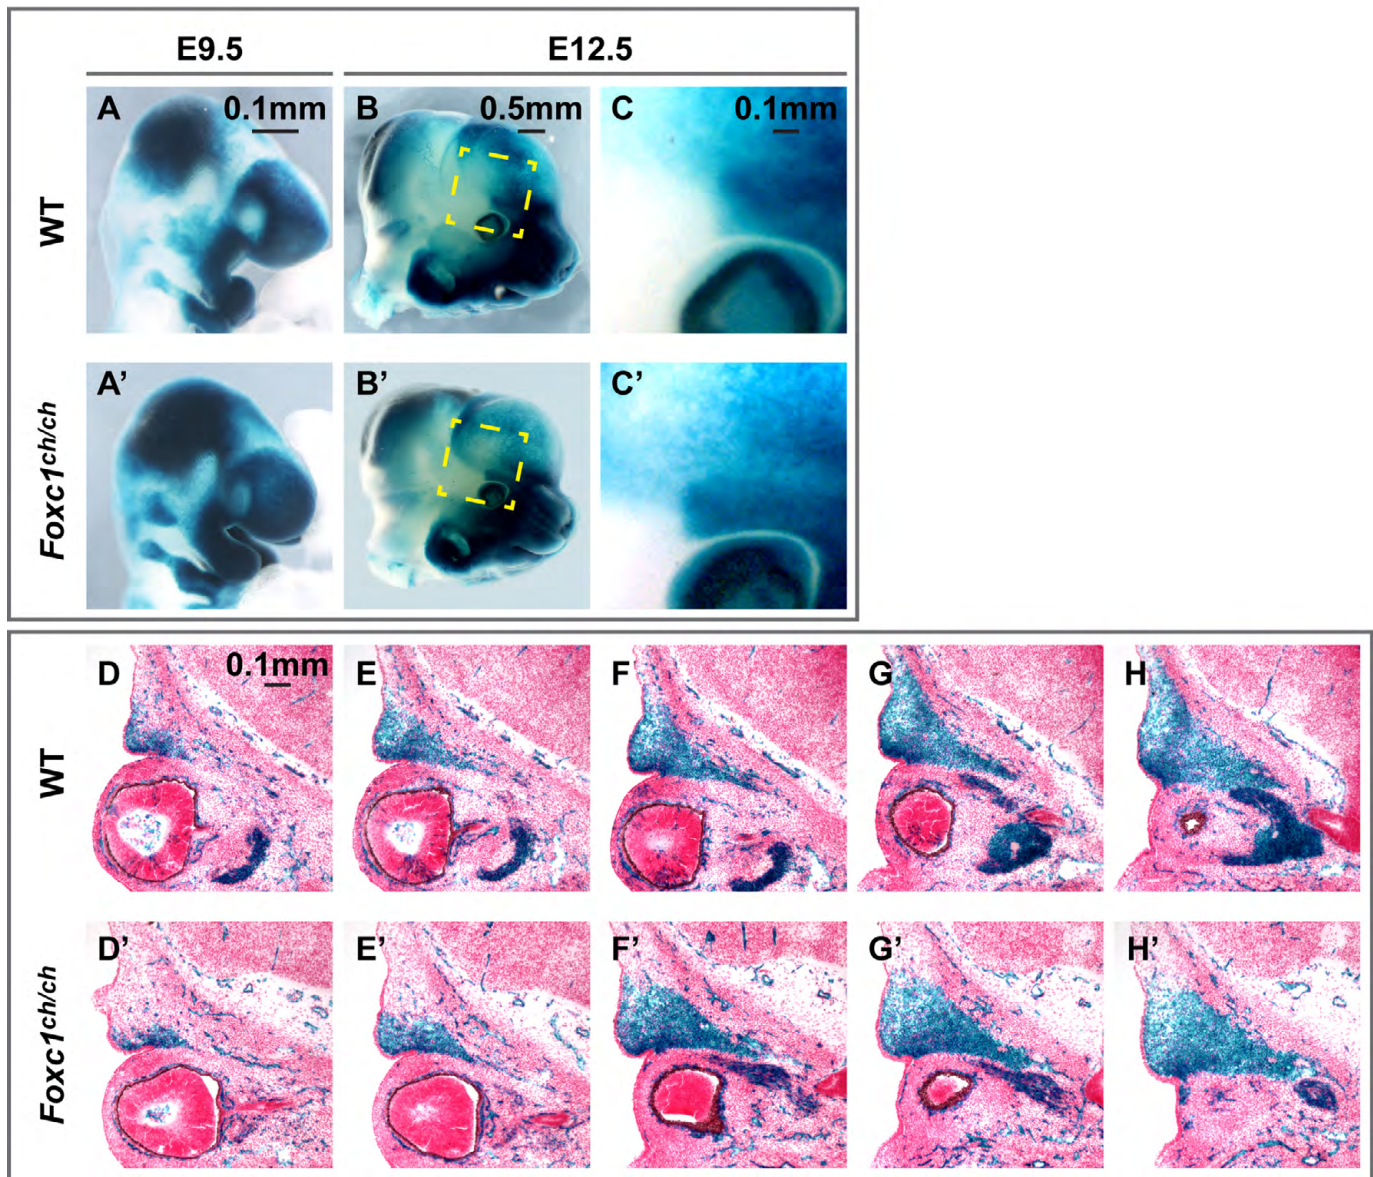

**Fig. S2. Distribution of cranial neural crest and head mesoderm in *Foxc1* mutant embryos.** (A-H') Neural crest-derived cells were labeled with *Wnt1-Cre; R26R-lacZ* (A-C') and mesoderm-derived cells with *Mesp1-Cre; R26R-lacZ* (D-H'). We carried out whole-mount staining for β-galactosidase of wild-type and *Foxc1* mutant embryos at E9.5 and E12.5. At both stages, the gross distribution of neural crest cells was almost indistinguishable in the mutant versus wild-type embryos (A',B' versus A,B), the only apparent difference being a slight posterior shift of the neural crest population in the supraorbital ridge in *Foxc1* mutants (C,C'). (D-H') Sections from E12.5 *Mesp1-Cre; R26R-lacZ* embryos of wild-type and *Foxc1* mutant background were stained for lacZ, revealing a distribution of neural crest and mesoderm consistent with the whole mounts shown in A-C and A'-C'.

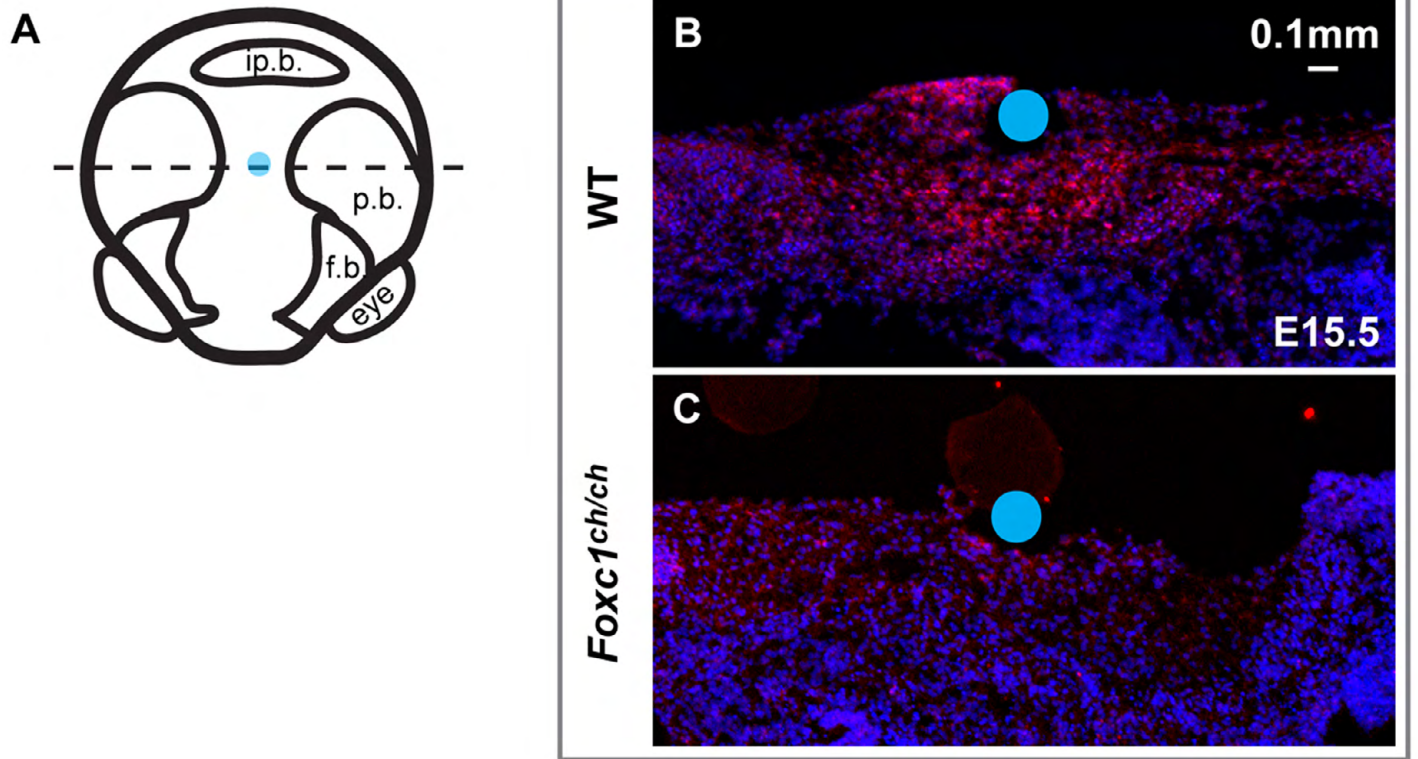

**Fig. S3. Reduced BMP-responsiveness of *Msx2* in *Foxc1<sup>ch/ch</sup>* embryonic head at E15.5.** (A-C) We excised the dorsal regions of E15.5 wild-type and *Foxc1<sup>ch/ch</sup>* heads and placed them in organ culture as described previously (Rice et al., 2003). BMP2-soaked beads were implanted in the dorsal midline as indicated in A and the explants were cultured for 48 hours. They were then fixed, sectioned and subjected to in situ hybridization for *Msx2*. Note the substantially greater *Msx2* signal (red color) in the wild type (B) compared with the *Foxc1<sup>ch/ch</sup>* explant (C).

**Table S1. Sequences of siRNA and primers for RT-PCR and ChIP analysis**

| <b>siRNA</b>                       | <b>sense</b>                             | <b>antisense</b>                         |
|------------------------------------|------------------------------------------|------------------------------------------|
| GFP                                | 5'-GAC GUA AAC GGC CAC<br>AAG UTT-3'     | 5'-ACU UGU GGC CGU UUA<br>CGU CTT-3'     |
| <b>RT-PCR</b>                      | <b>forward</b>                           | <b>reverse</b>                           |
| <i>Foxc1</i>                       | 5'-CGG CAC TCT TAG AGC<br>CAA AT-3'      | 5'-TTT GAG CTG ATG CTG<br>GTG AG-3'      |
| <i>Msx2</i>                        | 5'-AAT TCC GAA GAC GGA<br>GCA C-3'       | 5'-CTT CCG GTT GGT CTT<br>GTG TT-3'      |
| <i>ALP</i>                         | 5'-TGA CCT TCT CTC CTC<br>CAT CC-3'      | 5'-CTT CCT GGG AGT CCTC<br>ATC CT-3'     |
| <i>Runx2</i>                       | 5'-CCT GAA CTC TGC ACC<br>AAG TC-3'      | 5'-GAG GTG GCA GTG TCA<br>TCA TC-3'      |
| <i>Osteocalcin</i>                 | 5'- AGA CAA GTC CCA CAC<br>AGC A-3'      | 5'- CTG CTT GGA CAT GAA<br>GGC -3'       |
| <i>Gapdh</i>                       | 5'-ACC ACA GTC CAT GCC<br>ATC AC-3'      | 5'-TCC ACC ACC CTG TTG<br>CTG TA-3'      |
| <b>ChIP</b>                        | <b>forward</b>                           | <b>reverse</b>                           |
| endogenous <i>Msx2</i><br>enhancer | 5'-TCT GCC CAG TTG GAG<br>GTT TGA-3'     | 5'-GCC GCG TTA ATT GCT<br>CTC G-3'       |
| <i>β-Actin</i> promoter            | 5'-AGC TTC TTT GCA GCT<br>CCT TCG TTG-3' | 5'-ATC TTC TCC ATG TCG<br>TCC CAG TTG-3' |
| <i>hsp68</i> mini<br>promoter      | 5'-GAG CTC CAG GAA CAT<br>CCA AA-3'      | 5'-GAT CCT CTC CAA TCG<br>CGT TA-3'      |
